# Supplementary material for: Direct Z-scheme Cs2O–Bi2O3–ZnO heterostructures for photocatalytic overall water splitting
Source: Royal Society of Chemistry journal article supplement (doi:10.1039/c8ta08033j), 2018-01-01
Supplement: c8ta08033j1.pdf [file c8ta08033j1.pdf]

## Electronic Supplementary Material (ESI)

### Direct Z-Scheme Cs<sub>2</sub>O-Bi<sub>2</sub>O<sub>3</sub>-ZnO Heterostructures for Photocatalytic Overall Water Splitting

Abdo Hezam,<sup>a</sup> K. Namratha,<sup>a</sup> Q.A. Drmosh,<sup>b</sup> Deepalekshmi Ponnamma,<sup>c</sup> Adel Morshed  
Nagi Saeed,<sup>d</sup> V.Ganesh,<sup>e</sup> B. Neppolian,<sup>f</sup> and K.Byrappa <sup>\*a</sup>

<sup>a</sup> Center for Materials Science and Technology, University of Mysore, Vijana Bhavana,  
Manasagangothiri, Mysuru-570006, India.

<sup>b</sup> Physics Department and Center of Research Excellence in Nanotechnology, King Fahd  
University of Petroleum and Minerals, Dhahran 31261, Saudi Arabia.

<sup>c</sup> Center for Advanced Materials, Qatar University, P O Box 2713, Doha, Qatar

<sup>d</sup> Department of Polymer Science and Technology, Sri Jayachamarajendra College of  
Engineering, JSS Science & Technology University, Mysuru – 570 006, India.

<sup>e</sup> Department of Physics & Nanotechnology, SRM Institute of Science and Technology,  
Chennai-603203, India.

<sup>f</sup> Energy and Environmental Remediation Lab, SRM-Research Institute, SRM Institute of  
Science and Technology, Chennai-603203, India.

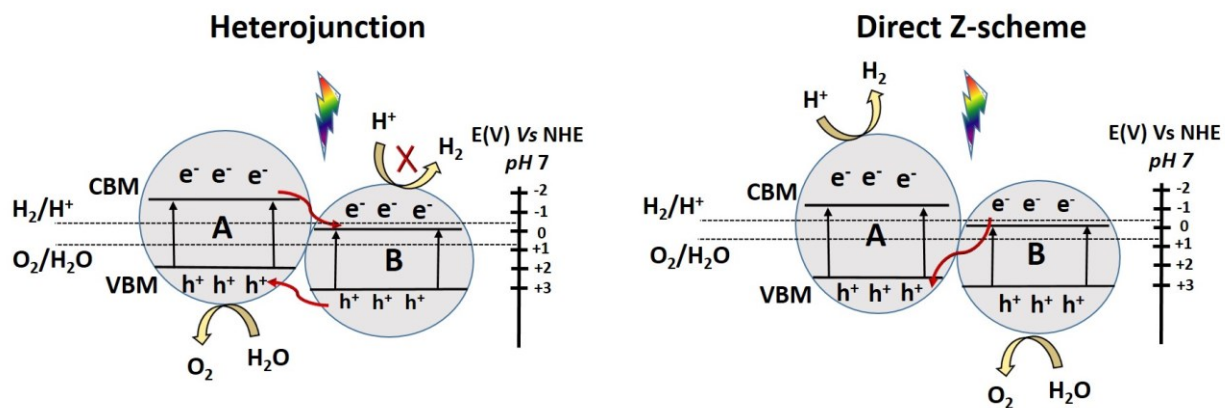

Scheme S1. Comparison of charge carriers migration pathway in heterojunction and direct Z-scheme systems.

## PXRD studies

Figure S1 shows comparison between the PXRD patterns of Cs<sub>2</sub>O-Bi<sub>2</sub>O<sub>3</sub>-ZnO (samples CBZ0.5, CBZ1, CBZ1.5 and CBZ2), Bi<sub>2</sub>O<sub>3</sub>-ZnO heterostructures (sample CBZ0), pristine Bi<sub>2</sub>O<sub>3</sub>, pristine ZnO, and pristine Cs<sub>2</sub>O. The PXRD patterns of Bi<sub>2</sub>O<sub>3</sub>, ZnO, and Cs<sub>2</sub>O are well matched with JCPDS file no. 71-2274, JCPDS Card No. 36-1451, and JCPDS file no. 71-2274, respectively, indicating the monoclinic crystal structure of Bi<sub>2</sub>O<sub>3</sub> and the hexagonal structure of ZnO and Cs<sub>2</sub>O. The Cs<sub>2</sub>O-Bi<sub>2</sub>O<sub>3</sub>-ZnO heterostructure consists of three phases namely, hexagonal Cs<sub>2</sub>O (PDF #09-0104)<sup>1</sup>, hexagonal ZnO (JCPDS Card No. 36-1451)<sup>2</sup> and monoclinic  $\alpha$ -Bi<sub>2</sub>O<sub>3</sub> (JCPDS file no. 71-2274)<sup>3</sup> while the PXRD pattern of the sample CBZ0 reveals that the Bi<sub>2</sub>O<sub>3</sub>-ZnO consists of monoclinic  $\alpha$ -Bi<sub>2</sub>O<sub>3</sub> and hexagonal ZnO phases only. Moreover, the PXRD study indicates that no crystal impurities are detected confirming the purity of the prepared heterostructures..

The characteristics peaks of Cs<sub>2</sub>O appear on the spectrum of CBZ1.5 at  $2\theta = 18.2, 25.7,$  and  $42.51^\circ$  (JCPDS 09-0104). The peaks at  $31.69, 34.83,$  and  $36.16^\circ$  for both CBZ1.5 and CBZ0 samples correspond to the hexagonal phases of ZnO (JCPDS 36-1451). The remaining peaks observed are due to the monoclinic phase of  $\alpha$ -Bi<sub>2</sub>O<sub>3</sub> (JCPDS 71-2274). It is worth noting that the peak intensity and/or peak width of heterostructures are not similar to those of pristine metal oxides indicating a change in the crystal growth and the size of heterostructure nanoparticles and confirming the formation of nanoscale heterostructures<sup>4,5</sup>. These results confirm the successful formation of Cs<sub>2</sub>O-Bi<sub>2</sub>O<sub>3</sub>-ZnO and Bi<sub>2</sub>O<sub>3</sub>-ZnO heterostructures.

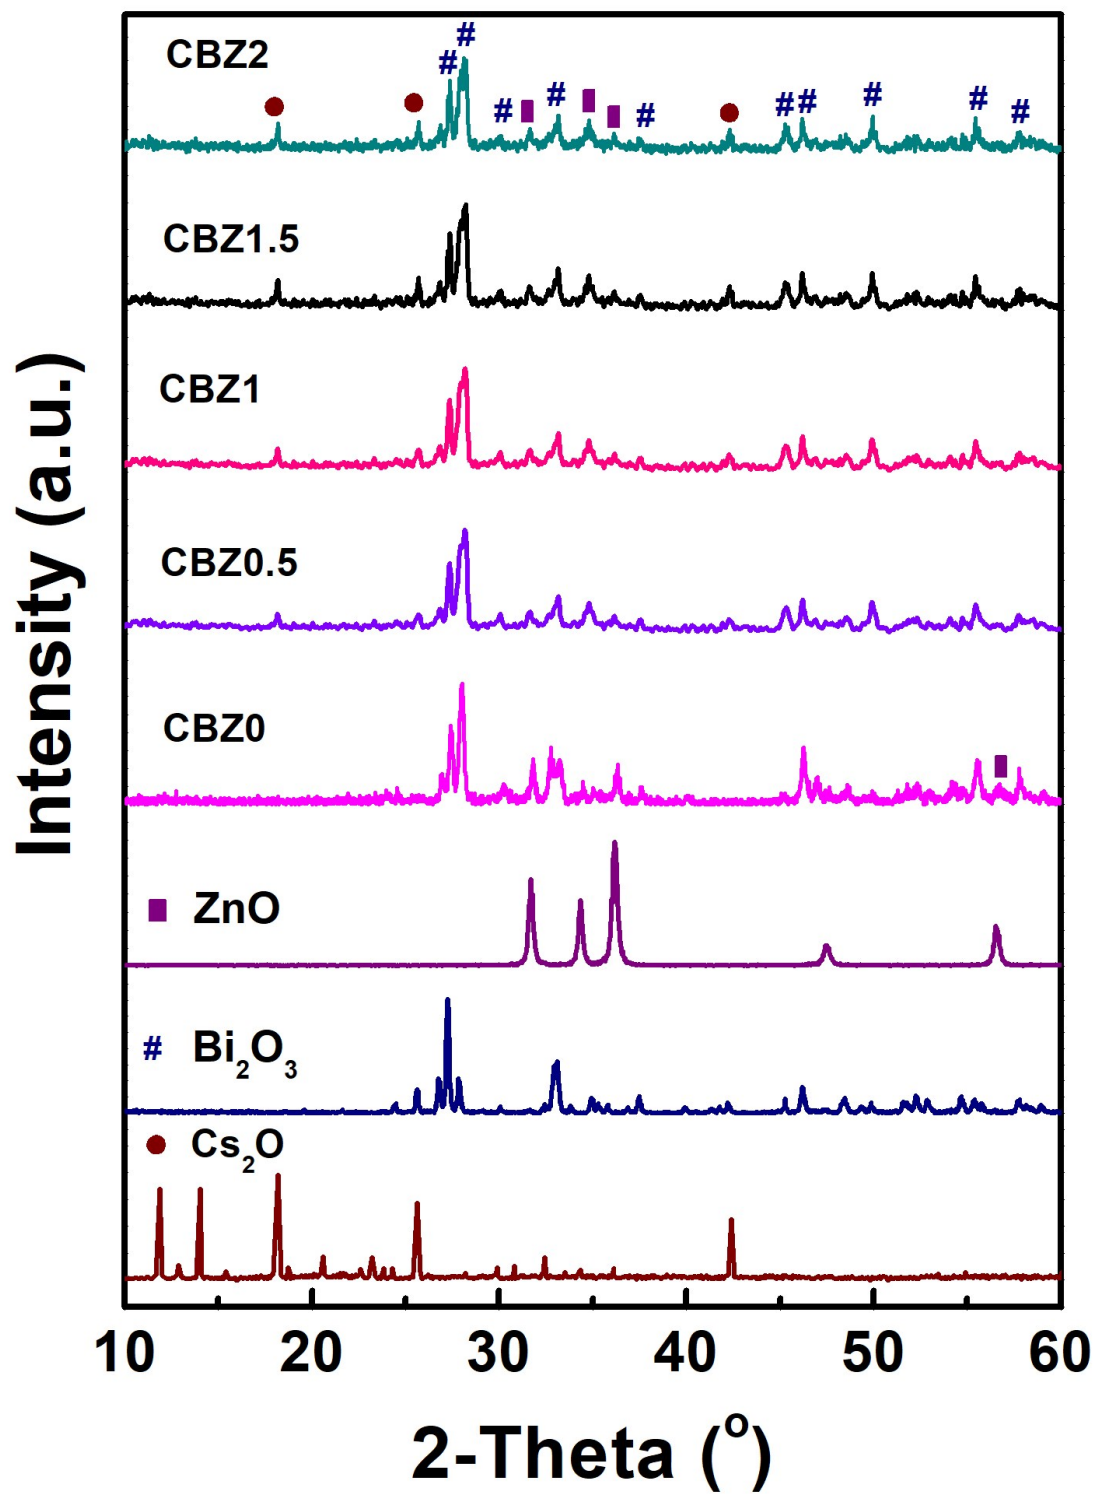

Fig. S1. PXRD patterns of  $\text{Cs}_2\text{O}$ ,  $\text{Bi}_2\text{O}_3$ ,  $\text{ZnO}$ ,  $\text{CBZ0}$ ,  $\text{CBZ0.5}$ ,  $\text{CBZ1}$ ,  $\text{CBZ1.5}$ , and  $\text{CBZ2}$  samples.

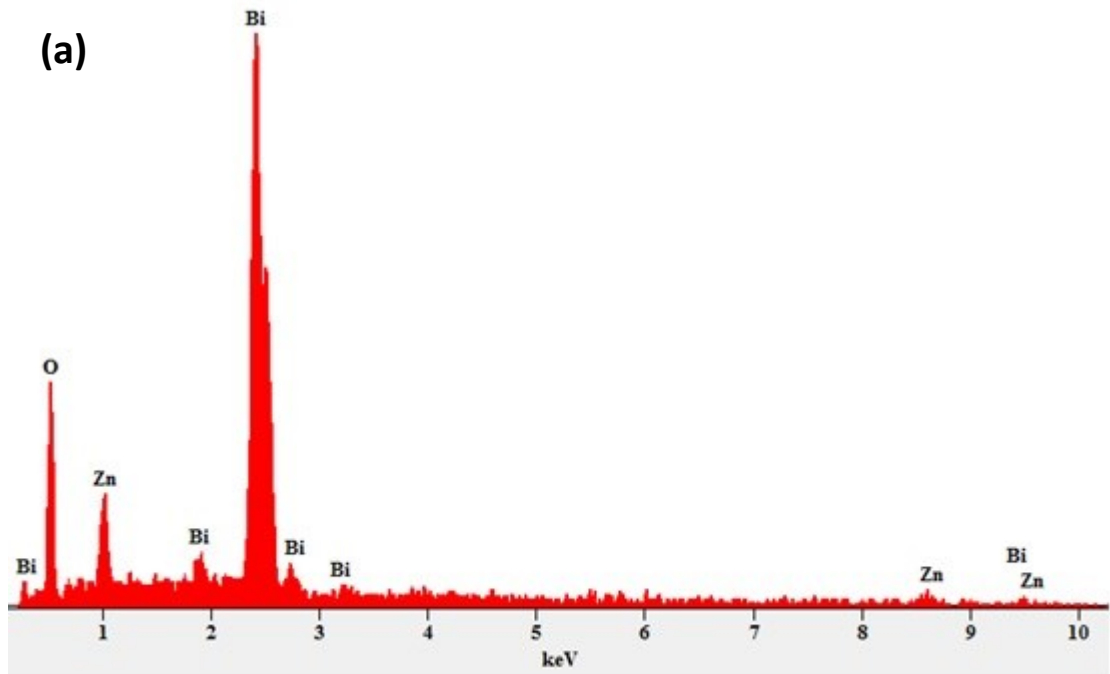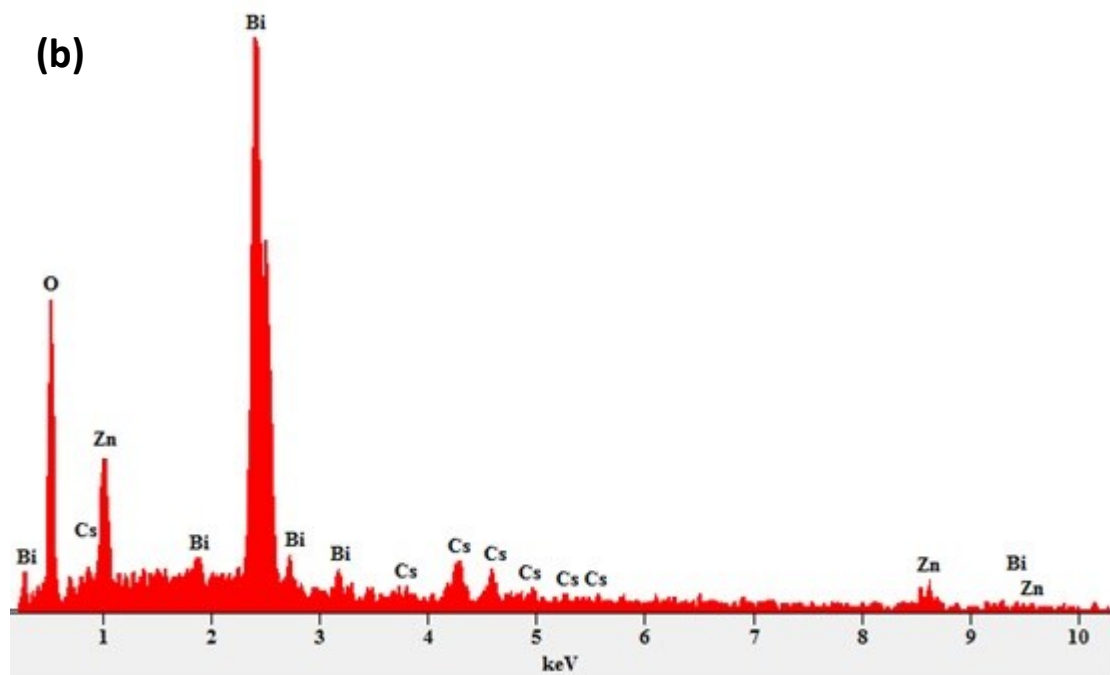

Fig. S2. EDX spectra of (a)  $\text{Bi}_2\text{O}_3\text{-ZnO}$  heterostructure (sample CBZ0), and (b) the optimized  $\text{Cs}_2\text{O-Bi}_2\text{O}_3\text{-ZnO}$  heterostructure (sample CBZ1.5).

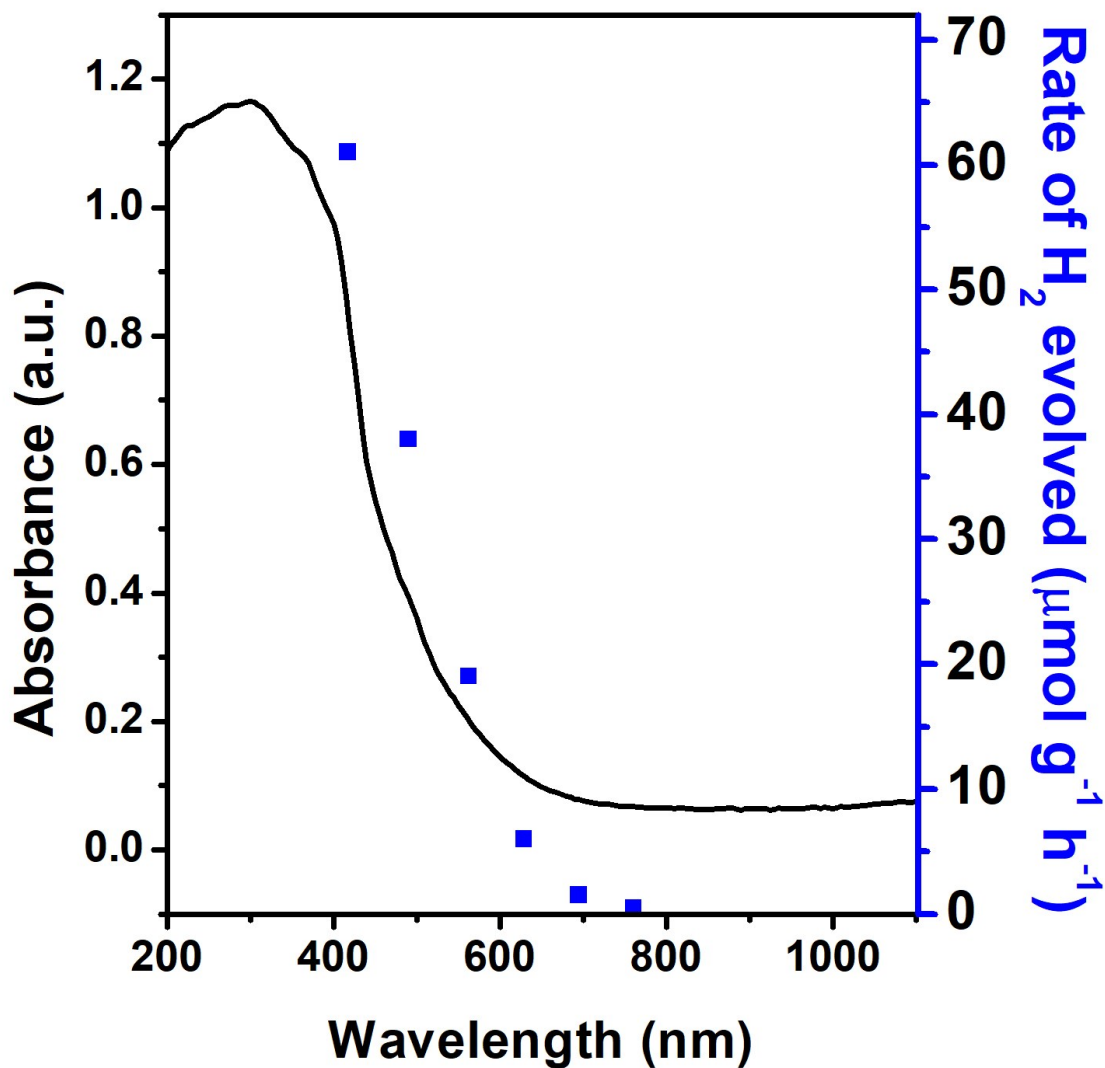

Fig. S3. Dependence of the rate of H<sub>2</sub> evolved on the wavelength of incident light (blue line) and the DRS UV-vis of CBZ1.5 sample (black line). Reaction conditions: 5 m g CBZ1.5 ; pure water; simulated sunlight (AM 1.5 G).

Fig. S3 shows that the positive relation between the photocatalytic activity of Cs<sub>2</sub>O-Bi<sub>2</sub>O<sub>3</sub>-ZnO and its optical absorption property (Fig. 5b).

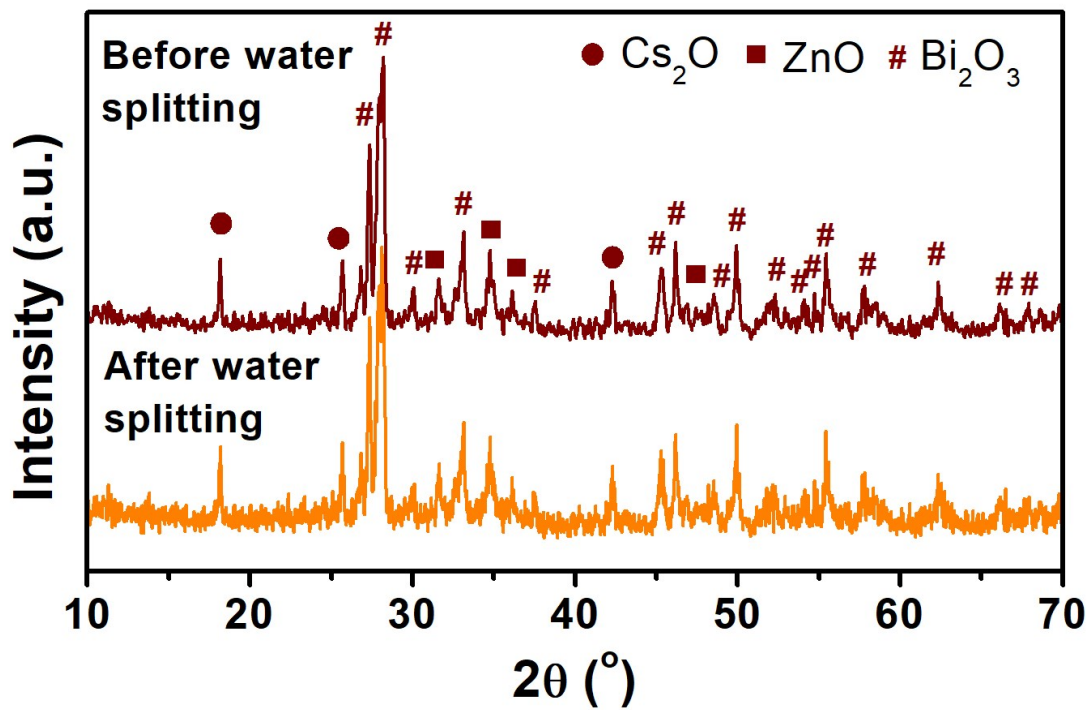

Fig. S4. PXRD patterns of the sample CBZ1.5 before and after water splitting experiment.

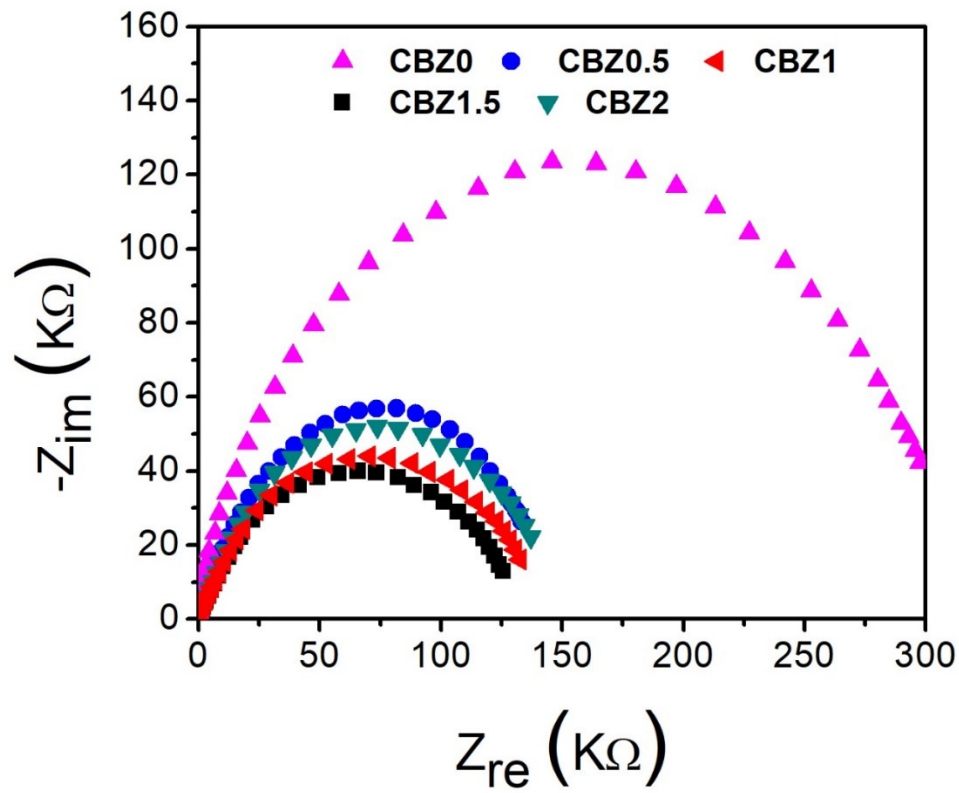

Fig. S5. Nyquist impedance plots of the different prepared samples.



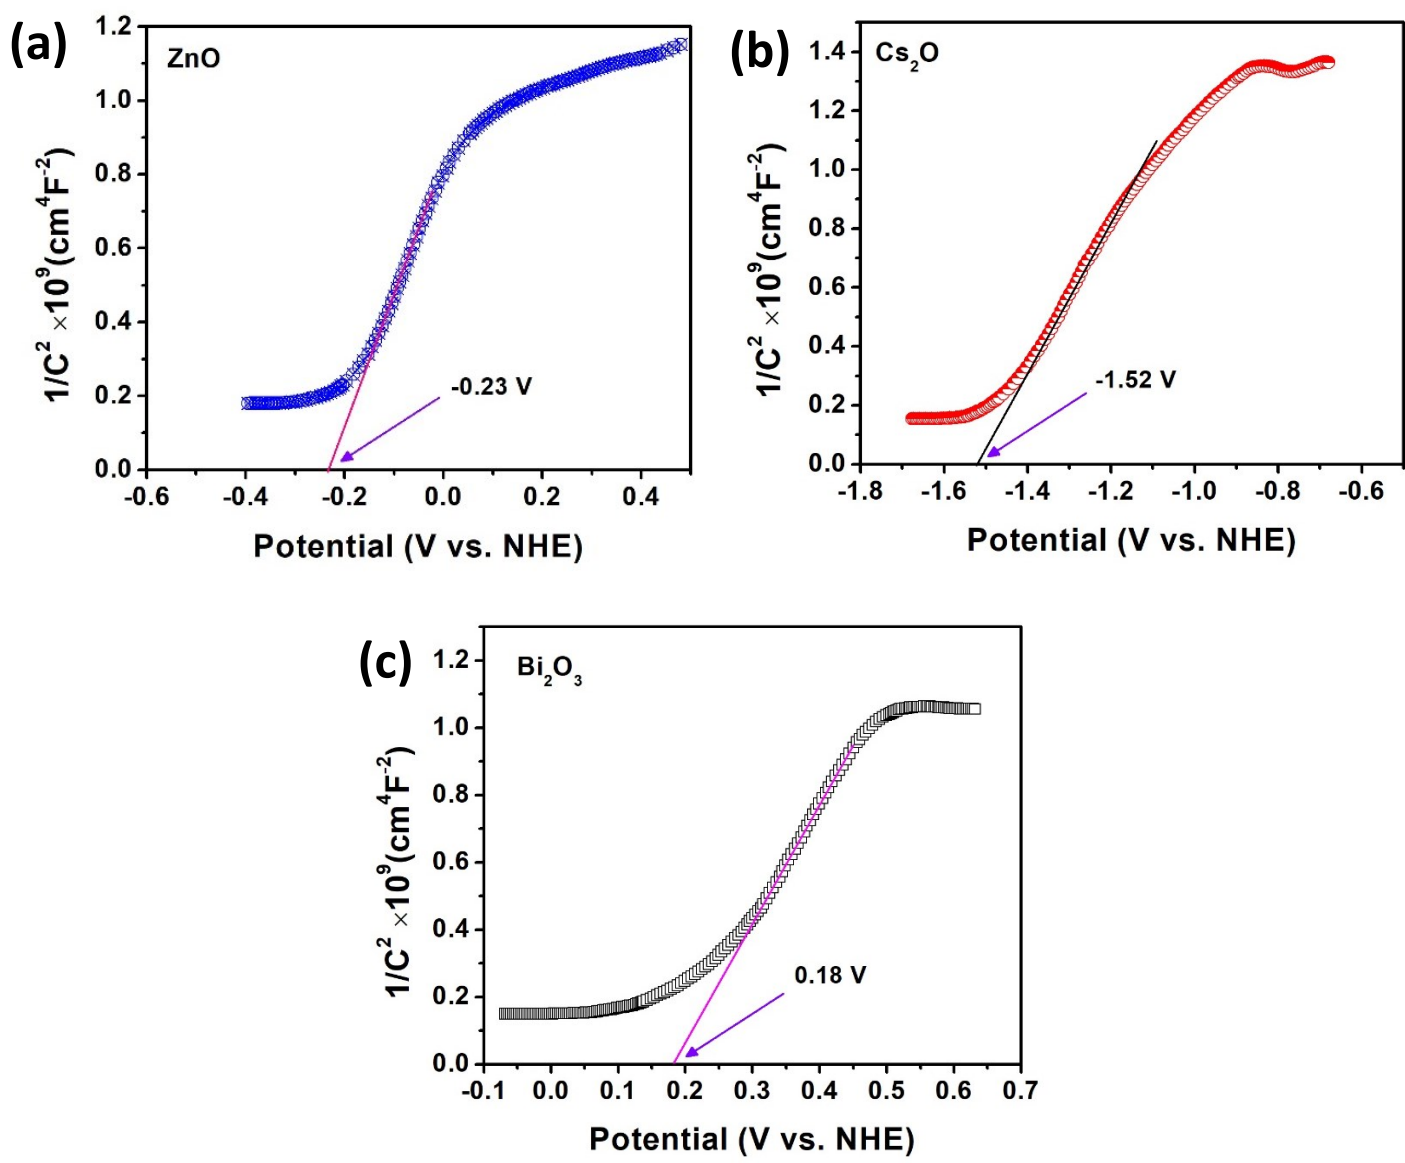

Fig. S6 Mott-Schottky plots for pristine (a) ZnO, (b) Cs<sub>2</sub>O, and (c) Bi<sub>2</sub>O<sub>3</sub>.

The photocatalytic water splitting of Cs<sub>2</sub>O under simulated sunlight irradiation (AM 1.5 G) in the absence of sacrificial agents (pure water) and in the presence of methanol and glycerol was measured and the results were presented in Figure S7. No H<sub>2</sub> molecules were detected in the absence of sacrificial agents. However, hydrogen production was 232 μmolg<sup>-1</sup>h<sup>-1</sup> in the presence of methanol (50% (v/v) methanol/water) and 556 μmolg<sup>-1</sup>h<sup>-1</sup> in the presence of glycerol (25% (v/v) glycerol/water). The higher hydrogen production rate in the presence of glycerol than methanol is attributed to higher polarity of glycerol.<sup>6</sup> CBM of Cs<sub>2</sub>O (-1.55 eV) is suitable to produce H<sub>2</sub> but its VBM (0.41 eV) is not suitable to produce O<sub>2</sub>, therefore, Cs<sub>2</sub>O was unable to split pure water in the absence of sacrificial agents. Sacrificial agents react with holes to reduce the electron-hole recombination and increase the photocatalytic activity of Cs<sub>2</sub>O.

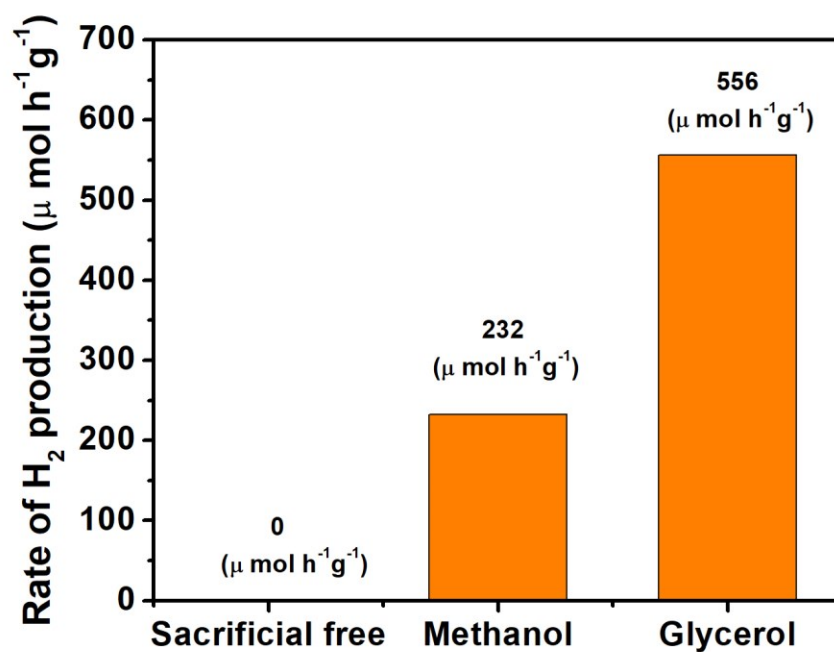

Fig. S7 Photocatalytic hydrogen production activity of pure Cs<sub>2</sub>O in the absence of sacrificial agents and in the presence of methanol and glycerol under simulated sunlight irradiation (AM 1.5 G).

To further explore the impact of Cs<sub>2</sub>O, the photocatalytic hydrogen production experiment was repeated using Bi<sub>2</sub>O<sub>3</sub>-ZnO as a photocatalyst in the presence of different sacrificial agents including methanol, glycerol, and triethanolamine (TEOA) solution. No H<sub>2</sub> was detected in each experiment. The formation of a junction between Bi<sub>2</sub>O<sub>3</sub> and ZnO makes Bi<sub>2</sub>O<sub>3</sub>-ZnO unable to produce H<sub>2</sub> even after adding sacrificial agents. This happens as the electrons are accumulated in the CB of Bi<sub>2</sub>O<sub>3</sub> which is more positive compared to H<sup>+</sup>/H<sub>2</sub>. Thus, Cs<sub>2</sub>O played a significant role in enhancing the photocatalytic activity of Cs<sub>2</sub>O-Bi<sub>2</sub>O<sub>3</sub>-ZnO heterostructure through constructing a Z-scheme system with Bi<sub>2</sub>O<sub>3</sub> and ZnO and extending its light absorption range.

Table S1. Elemental analysis of Bi<sub>2</sub>O<sub>3</sub>-ZnO and Cs<sub>2</sub>O-Bi<sub>2</sub>O<sub>3</sub>-ZnO heterostructures

| Sample                                                               | Bi              | Zn              | Cs             | O               | Total         | Bi:Zn   |
|----------------------------------------------------------------------|-----------------|-----------------|----------------|-----------------|---------------|---------|
| <b>CBZ0 (Bi<sub>2</sub>O<sub>3</sub>-ZnO)</b>                        | 25.39<br>atom % | 17.82<br>atom % | 0 atom %       | 56.79 atom<br>% | 100 atom<br>% | 1:0.702 |
| <b>CBZ1.5 (Cs<sub>2</sub>O-<br/>Bi<sub>2</sub>O<sub>3</sub>-ZnO)</b> | 21.78<br>atom % | 15.32<br>atom % | 0.67 atom<br>% | 62.23 atom<br>% | 100 atom<br>% | 1:0.703 |

Table S2. Overall water splitting using different samples under simulated sunlight irradiation Am 1.5 G.

| Sample | H <sub>2</sub> ( μmol h <sup>-1</sup> g <sup>-1</sup> ) | O <sub>2</sub> (μmol h <sup>-1</sup> g <sup>-1</sup> ) |
|--------|---------------------------------------------------------|--------------------------------------------------------|
| CBZ0   | 0                                                       | 0                                                      |
| CBZ0.5 | 65.2                                                    | 31.9                                                   |
| CBZ1   | 123.9                                                   | 62.1                                                   |
| CBZ1.5 | 149.5                                                   | 73.2                                                   |
| CBZ2   | 97.8                                                    | 47.7                                                   |

Table S3. Summary of the recent Z-scheme photocatalysts for overall water splitting.

| Z-scheme systems with co-catalyst and or electrons mediator for Overall water splitting |                                                                                                                       |                 |                                                                                                                          |                                                                               |                    |             |                                                  |
|-----------------------------------------------------------------------------------------|-----------------------------------------------------------------------------------------------------------------------|-----------------|--------------------------------------------------------------------------------------------------------------------------|-------------------------------------------------------------------------------|--------------------|-------------|--------------------------------------------------|
| Entry                                                                                   | Photocatalyst                                                                                                         | AQE             | Activity                                                                                                                 | Conditions of photocatalytic reaction                                         | Electrons Mediator | Co-Catalyst | Ref                                              |
| 1                                                                                       | MgTa <sub>2</sub> O <sub>6-x</sub> N <sub>y</sub> /TaON/PtO <sub>x</sub> -WO <sub>3</sub>                             | 6.8% at 420 nm  | H <sub>2</sub> : 480 μmol h <sup>-1</sup> g <sup>-1</sup><br>O <sub>2</sub> : 250 μmol h <sup>-1</sup> g <sup>-1</sup>   | λ > 420 nm (Xenon lamp, 300 W)<br>9.1x10 <sup>21</sup> photon h <sup>-1</sup> | Yes                | Yes         | <i>Angew. Chem. Int. Ed.</i> 2015, 54, 8498–8501 |
| 2                                                                                       | SrTiO <sub>3</sub> :La,Rh/Au/BiVO <sub>4</sub>                                                                        | 5.9% at 418 nm  | H <sub>2</sub> : 2100 μmol h <sup>-1</sup> g <sup>-1</sup><br>O <sub>2</sub> : 1000 μmol h <sup>-1</sup> g <sup>-1</sup> | λ > 420 nm (Xenon lamp, 300 W)                                                | Yes                | Yes         | <i>J. Catal.</i> 2015, 328, 308–315              |
| 3                                                                                       | RhCrO <sub>x</sub> /ZrO <sub>2</sub> /LaMg <sub>1/3</sub> Ta <sub>2/3</sub> O <sub>2</sub> N/Au/BiVO <sub>4</sub> :Mo | 0.07% at 418 nm | H <sub>2</sub> : 60 μmol h <sup>-1</sup> g <sup>-1</sup><br>O <sub>2</sub> : 30 μmol h <sup>-1</sup> g <sup>-1</sup>     | λ > 420 nm (Xenon lamp, 300 W),<br>pure water                                 | Yes                | Yes         | <i>ACS Catal.</i> 2016, 6, 7188–7196             |
| 4                                                                                       | Pt/CuGaS <sub>2</sub> /RGO/BiVO <sub>4</sub> /CoO <sub>x</sub>                                                        | -               | H <sub>2</sub> : 35 μmol h <sup>-1</sup><br>O <sub>2</sub> : 17 μmol h <sup>-1</sup>                                     | λ > 420 nm (Xenon lamp, 300 W),                                               | Yes                | Yes         | <i>J. Am. Chem. Soc.</i> 2016, 138, 10260–10264  |
| 5                                                                                       | Ta <sub>3</sub> N <sub>5</sub> /BaTaO <sub>2</sub> N                                                                  | 0.1% at 420 nm  | H <sub>2</sub> : 3.2 μmol h <sup>-1</sup><br>O <sub>2</sub> : 1.6 μmol h <sup>-1</sup>                                   | λ > 420 nm (300 W xenon lamp)                                                 | Yes                | Yes         | <i>Chem. Sci.</i> , 2017,8, 437-443              |
| 6                                                                                       | Ru loaded SrTiO <sub>3</sub> :La,<br>Rh/BiVO <sub>4</sub> :Mo                                                         | 19% at 419 nm   | H <sub>2</sub> : 3200 μmol h <sup>-1</sup> g <sup>-1</sup><br>O <sub>2</sub> : 1600 μmol h <sup>-1</sup> g <sup>-1</sup> | λ > 420 nm (300 W xenon lamp), pure water                                     | Yes                | Yes         | <i>J. Am. Chem. Soc.</i> 2017, 139, 1675–1683    |
| 7                                                                                       | RuO <sub>2</sub> /TiO <sub>2</sub> :Ta /N,<br>Ru/SrTiO <sub>3</sub> :Rh                                               | 0.5% at 420 nm  | -                                                                                                                        | NaIO <sub>3</sub> or FeCl <sub>3</sub> (1mM) solution                         | Yes                | Yes         | <i>J. Mater. Chem. A</i> , 2017,5, 18870-18877   |
| 8                                                                                       | MoS <sub>2</sub> /CdS, Co <sub>2</sub> O <sub>3</sub> /BiVO <sub>4</sub>                                              | 1.04% at 420 nm | H <sub>2</sub> : 14.5 μmol h <sup>-1</sup><br>O <sub>2</sub> : 7.1 μmol h <sup>-1</sup>                                  | λ > 420 nm (300 W xenon lamp, output intensity of 200 mW/cm <sup>2</sup> ),   | Yes                | No          | <i>J. Mater. Chem. A</i> , 2017,5, 21205-21213   |
| Mediator and Co-Catalysts-Free Direct Z-scheme systems for Overall water splitting      |                                                                                                                       |                 |                                                                                                                          |                                                                               |                    |             |                                                  |
|                                                                                         | Photocatalyst                                                                                                         | AQE             | Activity                                                                                                                 | Conditions of photocatalytic reaction                                         | Electrons Mediator | Co-Catalyst | Ref                                              |
| 9                                                                                       | Co <sub>3</sub> (PO <sub>4</sub> ) <sub>2</sub> /α-Fe <sub>2</sub> O <sub>3</sub>                                     | -               | H <sub>2</sub> : 0.63 μmol h <sup>-1</sup><br>O <sub>2</sub> : 0.32 μmol h <sup>-1</sup>                                 | 400 nm < λ < 700 nm (LED),                                                    | No                 | No          | <i>Catal. Sci. Technol.</i> , 2018,8, 840-       |

|    |                                                       |                    |                                                                                                                                |                                                                                                                                                              |    |    |                                                                                  |
|----|-------------------------------------------------------|--------------------|--------------------------------------------------------------------------------------------------------------------------------|--------------------------------------------------------------------------------------------------------------------------------------------------------------|----|----|----------------------------------------------------------------------------------|
|    |                                                       |                    |                                                                                                                                | Pure water                                                                                                                                                   |    |    | 846                                                                              |
| 10 | Bi <sub>2</sub> WO <sub>6</sub> -Cu <sub>3</sub> P    | -                  | H <sub>2</sub> : 9.3 μmol/gcatalyst<br>and 4.6<br>O <sub>2</sub> : μmol/gcatalyst                                              | AM 1.5G<br>simulated<br>sunlight with<br>100 mW cm <sup>-2</sup> ,<br><br>Na <sub>2</sub> HPO <sub>4</sub> /<br>NaH <sub>2</sub> PO <sub>4</sub><br>solution | No | No | <i>Nanoscale</i> ,<br>2018, <b>10</b> ,<br>3026-3036                             |
| 11 | Si/MgTiO <sub>2</sub>                                 | -                  | H <sub>2</sub> : 159.33 μmol g <sup>-1</sup> h <sup>-1</sup>                                                                   | >420 nm<br>(Xenon lamp,<br>300 W), pure<br>water                                                                                                             | No | No | <i>Int. J.<br/>Hydrogen<br/>Energy</i> ,<br>2016, <b>41</b> ,<br>14713–<br>14720 |
| 12 | Black Phosphorus/BiVO <sub>4</sub>                    | 0.89%<br>at 420 nm | H <sub>2</sub> : 160 μmol g <sup>-1</sup> h <sup>-1</sup><br>O <sub>2</sub> : 102 μmol g <sup>-1</sup> h <sup>-1</sup>         | 420 nm (Xenon<br>lamp, 320W),<br><br>Pure water                                                                                                              | No | No | <i>Angew.<br/>Chem. Int.<br/>Ed.</i> <b>2018</b> , <i>57</i> ,<br>2160..         |
| 13 | Cs <sub>2</sub> O-Bi <sub>2</sub> O <sub>3</sub> -ZnO |                    | <b>H<sub>2</sub> :149.5 μmol g<sup>-1</sup> h<sup>-1</sup></b><br><b>O<sub>2</sub>: 73.2 μmol g<sup>-1</sup>h<sup>-1</sup></b> | <b>AM 1.5G<br/>simulated<br/>sunlight with<br/>100 mW cm<sup>-2</sup></b>                                                                                    | No | No | <b>The present<br/>work</b>                                                      |

Table S4. Calculations of VBM and CBM from Tauc plot.

| <b>Semiconductor</b>           | <b><math>\chi</math><br/>(eV)</b> | <b>E<sub>g</sub><br/>(eV)</b> | <b>CBM<br/>(eV)</b> | <b>VBM<br/>(eV)</b> |
|--------------------------------|-----------------------------------|-------------------------------|---------------------|---------------------|
| Cs <sub>2</sub> O              | 3.89                              | 1.96                          | -1.59               | 0.37                |
| Bi <sub>2</sub> O <sub>3</sub> | 5.99                              | 2.74                          | 0.12                | 2.86                |
| ZnO                            | 5.79                              | 3.1                           | -0.26               | 2.84                |

Table S5. Calculations of VBM and CBM using VB-XPS analysis.

| <b>Semiconductor</b>           | <b>E<sub>g</sub><br/>(eV)</b> | <b>CBM<br/>(eV)</b> | <b>VBM<br/>(eV)</b> |
|--------------------------------|-------------------------------|---------------------|---------------------|
| Cs <sub>2</sub> O              | 1.96                          | -1.55               | 0.41                |
| Bi <sub>2</sub> O <sub>3</sub> | 2.74                          | 0.15                | 2.89                |
| ZnO                            | 3.10                          | -0.28               | 2.82                |

Table S6. Calculations of VBM and CBM from Mott-Schottky plots.

| <b>Semiconductor</b>           | <b>E<sub>g</sub><br/>(eV)</b> | <b>CBM<br/>(eV)</b> | <b>VBM<br/>(eV)</b> |
|--------------------------------|-------------------------------|---------------------|---------------------|
| Cs <sub>2</sub> O              | 1.96                          | -1.52               | 0.44                |
| Bi <sub>2</sub> O <sub>3</sub> | 2.74                          | 0.18                | 2.92                |
| ZnO                            | 3.1                           | -0.23               | 2.87                |



## References

- 1 A. Band, A. Albu-Yaron, T. Livneh, H. Cohen, Y. Feldman, L. Shimon, R. Popovitz-Biro, V. Lyahovitskaya and R. Tenne, *J. Phys. Chem. B*, 2004, **108**, 12360–12367.
- 2 Y. Liu, Z. H. Kang, Z. H. Chen, I. Shafiq, J. a Zapien and I. Bello, *Cryst. Growth Des.*, 2009, **9**, 3222–3227.
- 3 S. Sood, A. Umar, S. Kumar Mehta and S. Kumar Kansal, *Ceram. Int.*, 2015, **41**, 3355–3364.
- 4 Y. C. Ma, Y. H. Guo, H. Y. Jiang, D. Qu, J. Liu, W. K. Kang, Y. Yi, W. Zhang, J. S. Shi and Z. Z. Han, *New J. Chem.*, 2015, 39, 5612–5620.
- 5 A. Hezam, K. Namratha, Q. A. Drmosh, Z. H. Yamani and K. Byrappa, *Ceram. Int.*, 2017, 43, 5292–5301.
6. G. Sadanandam, K. Lalitha, V. D. Kumari, M. V. Shankar and M. Subrahmanyam, *Int. J. Hydrogen Energy*, 2013, **38**, 9655–9664.
